# Supplementary material for: Profiling the unique protective properties of intracranial arterial endothelial cells
Source: PubMed Central journal article supplement (PMC6792251; doi:10.1186/s40478-019-0805-4), 2019-10-14

## **Additional file 1**

### **Additional file 1: Table and Figure legends**

**Table S1 mRIN value with z-score and P-value for each sample** Two samples per patient, first sample derived from BA, second sample derived from CCA. Samples with P-value > 0.05 were used in RNA sequencing analysis [1].

**Table S2 List of primers used in this study** Full names with gene symbols and primer sequences used for qPCR analysis.

**Table S3 Differential expression of genes per gene set analyzed.** (A) Gene set consisting of genes upregulated in primary endothelial cell types (lung, aortic, iliac, dermal, and colon) treated with interferon-gamma (IFN $\gamma$ ) (MSigDB ID: M4551). Almost all genes induced by IFN $\gamma$  were higher expressed in extracranial ECs compared to intracranial ECs. (B) Genes differentially expressed in intracranial ECs and extracranial ECs and involved in EC damage response. Subcategorized for response to oxidative stress, EC proliferation, inflammatory response, cell adhesion, EC differentiation and vascular permeability. (C) 15 genes differentially expressed in intracranial ECs and extracranial ECs and related to perfusion and cognition. LogFC < 0 is expression elevated in intracranial ECs, logFC > 0 is elevated in extracranial ECs.

**Figure S1 Expression stability of reference targets** vWF and Pecam1/CD31 are most stable (lowest geNorm M, with M as gene stability value [2]) between BA and CCA samples (n=11 patients). (1) and (2) refers to different primer pairs. CD34 = cluster of differentiation 34, Cdh5 = cadherin 5, Kdr = Kinase Insert Domain Receptor/Vascular Endothelial Growth Factor Receptor 2, Pecam = Platelet And Endothelial Cell Adhesion Molecule 1/CD31, Rplp0 = Ribosomal Protein Lateral Stalk Subunit P0, vWF = Von Willebrand Factor.

**Figure S2 Normalized expression of DSP, HOPX and SCN3B in ALS versus non-ALS patients.** Beeswarm plots with the normalized expression (log<sub>2</sub>CPM) of (a) DSP, (b) HOPX and (c) SCN3B in the BA and CCA samples used for RNA sequencing. No differences between ALS and non-ALS patient are detected.

**Figure S3 Correlation between PMD and mRIN values.** PMD of (a) BA samples and (b) CCA samples (n=11 individuals) correlated to their mRIN values. No significant correlation found for BA and CCA samples. Dots are individuals used in our analysis (see also table 1 for PMD per individual).

## References

1. Feng H, Zhang X, Zhang C (2015) mRIN for direct assessment of genome-wide and gene-specific mRNA integrity from large-scale RNA-sequencing data. *Nat Commun* 6:7816. doi:10.1038/ncomms8816
2. Hellemans J, Mortier G, De Paepe A, Speleman F, Vandesompele J (2007) qBase relative quantification framework and software for management and automated analysis of real-time quantitative PCR data. *Genome Biol* 8:R19. doi:10.1186/gb-2007-8-2-r19

**Table S1**

| <b>Patient</b> | <b>Sample</b> | <b>mRIN</b> | <b>z-score</b> | <b>P-value</b> |
|----------------|---------------|-------------|----------------|----------------|
| 1              | s001          | 0.001       | -0.179         | 0.429          |
|                | s002          | 0.013       | 0.719          | 0.764          |
| 2              | s003          | -0.008      | -0.870         | 0.192          |
|                | s004          | 0.027       | 1.738          | 0.959          |
| 3              | s005          | 0.009       | 0.254          | 0.600          |
|                | s006          | 0.024       | 1.555          | 0.940          |
| 4              | s007          | 0.009       | 0.423          | 0.664          |
|                | s008          | -0.012      | -1.116         | 0.132          |
| 5              | s009          | 0.009       | 0.449          | 0.673          |
|                | s010          | -0.005      | -0.655         | 0.256          |
| 6              | s011          | 0.022       | 1.355          | 0.912          |
|                | s012          | 0.007       | 0.278          | 0.609          |
| 7              | s013          | 0.001       | -0.146         | 0.442          |
|                | s014          | -0.001      | -0.358         | 0.360          |
| 8              | s015          | 0.002       | -0.076         | 0.470          |
|                | s016          | 0.017       | 1.004          | 0.842          |
| 9              | s017          | -0.008      | -0.870         | 0.192          |
|                | s018          | -0.014      | -1.291         | 0.098          |

**Table S2**

| Full name (provided by HGNC)                      | Symbol | Sequence forward primer   | Sequence reverse primer  |
|---------------------------------------------------|--------|---------------------------|--------------------------|
| Actin alpha 2, smooth muscle                      | ACTA2  | CCAGCAGATGTGGATCAGCAA     | TGCTAGAGACAGAGAGGAGCA    |
| Beta-2-microglobulin                              | B2M    | TTTCATCCATCCGACATTG       | CGGCAGGCATACTCATCTTT     |
| Cannabinoid receptor 1                            | CNR1   | TAACAGCATGGGGGACTCGG      | CTCACAGAGCCTCGGCAGAC     |
| Collagen type I alpha 2 chain                     | Col1A2 | TTTGGACATCGGTGGTGCT       | TGCCACAATTTAAGCAAGTAGA   |
| Collagen type III alpha 1 chain                   | Col3A1 | CGTTGGCCCTGTTTGCTTTT      | TTGTCCGGTCACTTGCACTGG    |
| Desmoplakin                                       | DSP    | GTGTCGTCCAAGGGCTTACC      | TAGCAACCACTCCCACTGAC     |
| HOP homeobox                                      | HOPX   | AACAAGGTCGACAAGCACCC      | GCTGTCAATGCCTGCCATCT     |
| Kruppel like factor 2                             | KLF2   | AGTGGCATCTTCTCTCCACC      | GGCCCTTATTTCTCACAAGGC    |
| Myosin light chain 4                              | MYL4   | AGCACATCATGTCAGGGTGA      | TGGCCGTGTTAGAGCTGTTT     |
| Neuregulin 1                                      | NRG1   | ACCCCTGATTCCTACCGAGA      | AGCTTGGCGTGTGGAAATCT     |
| Nitric oxide synthase 3                           | NOS3   | CTCATGGGCACGGTGATG        | ACCACGTCATACTCATCCATACAC |
| Phosphodiesterase 4D                              | PDE4D  | AGAGGAGGCAGTAGGGGAAG      | CCTGGCAGATGACAGTGAGG     |
| Platelet and endothelial cell adhesion molecule 1 | PECAM1 | ATTCCTGAAGTCCGGATCTATG    | ACCTTGGATGGCCTCTTTCT     |
| Ryanodine receptor 3                              | RYR3   | AAAAGAAGAAGCGGCGGTGT      | GCGAAGGCTACAAACAGAGCA    |
| S100 calcium binding protein A4                   | S100A4 | CTGCATCGCCATGATGTGTA      | CCCAACCACATCAGAGGAGT     |
| Sodium voltage-gated channel beta subunit 3       | SCN3B  | ACCTTGCCATCCCATCTGAG      | GTCCAGTCCCTCAGGTGTTT     |
| Thrombomodulin                                    | THBD   | GCATTACAGCTGGAGAAGACCC    | TTCTCCTCCCTAATCACCCC     |
| Tight junction protein 1                          | TJP1   | AAGTCACACTGGTGAAATCC      | CTCTTGCTGCCAAACTATCT     |
| Vascular endothelial growth factor A              | VEGFA  | CATCTTCAAGCCATCCTGCTGTGTG | GCATGGTGTGTTGGACTCCT     |
| Vimentin                                          | VIM    | TCCCTCTGGTTGATACCCACT     | CGTGATGCTGAGAAGTTTCGT    |
| Von Willebrand factor                             | vWF    | TGCTGACACCAGAAAAGTGC      | CACAGGAGCAGGTGTCGTAA     |

**Table S3A****Response to IFN $\gamma$** 

| hgnc_symbol | entrezgene | LogFC  | -Log10(pVal) |
|-------------|------------|--------|--------------|
| CX3CL1      | 6376       | -0.933 | 3.701        |
| RABL3       | 285282     | -0.437 | 0.627        |
| IFIH1       | 64135      | -0.316 | 0.465        |
| DTX3L       | 151636     | -0.209 | 0.251        |
| RARRES3     | 5920       | -0.117 | 0.043        |
| VAMP5       | 10791      | -0.082 | 0.055        |
| SEPT4       | 5414       | 0.088  | 0.074        |
| SLC25A28    | 81894      | 0.128  | 0.195        |
| TNFSF10     | 8743       | 0.152  | 0.047        |
| WARS        | 7453       | 0.172  | 0.309        |
| IL18BP      | 10068      | 0.211  | 0.152        |
| UBE2L6      | 9246       | 0.318  | 0.249        |
| LAP3        | 51056      | 0.335  | 0.399        |
| TRIM22      | 10346      | 0.337  | 0.593        |
| CASP1       | 834        | 0.346  | 0.149        |
| LGALS9      | 3965       | 0.351  | 0.127        |
| PARP9       | 83666      | 0.361  | 0.418        |
| RNF213      | 57674      | 0.380  | 1.714        |
| GOLM1       | 51280      | 0.385  | 0.714        |
| NLRC5       | 84166      | 0.472  | 0.553        |
| MX1         | 4599       | 0.472  | 0.497        |
| IFI44L      | 10964      | 0.485  | 0.508        |
| DDX60       | 55601      | 0.543  | 0.973        |
| APOL2       | 23780      | 0.608  | 0.711        |
| PPP3CA      | 5530       | 0.634  | 0.950        |
| HLA-A       | 3105       | 0.636  | 1.440        |
| SSPN        | 8082       | 0.686  | 1.712        |
| HLA-C       | 3107       | 0.700  | 1.846        |
| HSD17B11    | 51170      | 0.703  | 0.923        |
| HLA-E       | 3133       | 0.773  | 1.986        |
| GBP1        | 2633       | 0.781  | 1.587        |
| MLKL        | 197259     | 0.787  | 0.637        |
| HLA-DRB1    | 3123       | 0.799  | 0.535        |
| SERPING1    | 710        | 0.827  | 4.819        |
| APOL1       | 8542       | 0.851  | 1.027        |
| HAUS7       | 55559      | 0.851  | 0.666        |
| BATF2       | 116071     | 0.854  | 0.408        |
| SAMD9L      | 219285     | 0.887  | 2.628        |
| C1S         | 716        | 0.893  | 1.601        |
| LGALS3BP    | 3959       | 0.940  | 1.179        |
| HLA-B       | 3106       | 0.950  | 2.277        |
| GBP3        | 2635       | 1.020  | 1.795        |
| GBP4        | 115361     | 1.070  | 1.308        |
| PARP14      | 54625      | 1.122  | 4.088        |
| GIMAP7      | 168537     | 1.148  | 0.598        |

|          |       |       |       |
|----------|-------|-------|-------|
| APOL3    | 80833 | 1.163 | 2.085 |
| HLA-DPA1 | 3113  | 1.168 | 0.645 |
| HLA-DRB5 | 3127  | 1.201 | 0.908 |
| IFI35    | 3430  | 1.364 | 1.015 |
| CD274    | 29126 | 1.416 | 1.066 |
| BST2     | 684   | 1.540 | 1.077 |
| HLA-DMA  | 3108  | 1.720 | 1.944 |
| OAS2     | 4939  | 1.754 | 1.383 |
| CFH      | 3075  | 1.819 | 2.641 |
| CEACAM1  | 634   | 1.842 | 1.777 |
| ST8SIA4  | 7903  | 2.076 | 2.158 |
| HLA-DQB1 | 3119  | 2.081 | 1.407 |
| HLA-DQA1 | 3117  | 2.131 | 1.890 |
| APOL4    | 80832 | 2.205 | 2.083 |
| PLA1A    | 51365 | 2.302 | 1.339 |
| OAS1     | 4938  | 2.487 | 1.783 |
| SAMHD1   | 25939 | 3.100 | 5.504 |
| CXCL9    | 4283  | 3.228 | 2.468 |

**Table S3B**

**ECs damage response**

**Response to oxidative stress**

| hgnc_symbol | entrezgene | LogFC  | -Log10(pVal) |
|-------------|------------|--------|--------------|
| NOS1        | 4842       | -4.312 | 4.619        |
| STC2        | 8614       | -4.121 | 4.254        |
| DHCR24      | 1718       | -2.846 | 2.446        |
| SLC7A11     | 23657      | -2.710 | 2.621        |
| RBM11       | 54033      | -2.374 | 1.351        |
| CYCS        | 54205      | -2.045 | 4.846        |
| PDGFD       | 80310      | 3.757  | 8.124        |
| SELENOP     | 6414       | 3.617  | 4.353        |
| CD38        | 952        | 3.061  | 3.258        |
| TRPM2       | 7226       | 2.680  | 1.709        |
| APOE        | 348        | 2.411  | 1.645        |
| ALDH3B1     | 221        | 2.189  | 1.863        |
| PDGFRA      | 5156       | 2.037  | 3.421        |

**EC proliferation**

| hgnc_symbol | entrezgene | LogFC  | -Log10(pVal) |
|-------------|------------|--------|--------------|
| FLT4        | 2324       | -4.995 | 5.260        |
| DLL4        | 54567      | -3.389 | 2.249        |
| THBS1       | 7057       | -2.361 | 4.219        |
| ALDH1A2     | 8854       | 4.036  | 4.386        |
| APOE        | 348        | 2.411  | 1.645        |
| BMP2        | 650        | 2.124  | 2.524        |
| HTR2B       | 3357       | 2.068  | 2.912        |
| CDH13       | 1012       | 2.372  | 6.421        |

**Inflammatory response**

| hgnc_symbol | entrezgene | LogFC  | -Log10(pVal) |
|-------------|------------|--------|--------------|
| KRT16       | 3868       | -6.920 | 8.020        |
| SCN9A       | 6335       | -5.197 | 8.864        |
| P2RX1       | 5023       | -5.159 | 8.587        |
| THBS1       | 7057       | -2.361 | 4.219        |
| CDO1        | 1036       | 4.222  | 5.112        |
| CD163       | 9332       | 3.871  | 3.476        |
| CHST2       | 9435       | 3.729  | 4.120        |
| TNFRSF21    | 27242      | 3.690  | 3.960        |
| TNFSF4      | 7292       | 3.430  | 3.555        |
| SIGLEC1     | 6614       | 3.429  | 3.664        |
| KIT         | 3815       | 3.304  | 3.018        |
| CXCL9       | 4283       | 3.228  | 2.469        |
| BMPR1B      | 658        | 3.188  | 5.289        |
| CCL4        | 6351       | 2.799  | 3.382        |
| CD180       | 4064       | 2.699  | 1.973        |
| NAIP        | 4671       | 2.679  | 2.321        |
| C3AR1       | 719        | 2.436  | 3.626        |
| CLEC7A      | 64581      | 2.429  | 1.707        |
| TLR1        | 7096       | 2.424  | 2.154        |
| SYK         | 6850       | 2.359  | 1.905        |
| CXCR4       | 7852       | 2.322  | 1.936        |
| LXN         | 56925      | 2.301  | 1.748        |
| AOAH        | 313        | 2.295  | 2.218        |
| PRKCQ       | 5588       | 2.233  | 1.729        |
| TLR4        | 7099       | 2.126  | 4.189        |
| BMP2        | 650        | 2.124  | 2.524        |
| GBP5        | 115362     | 2.118  | 1.792        |
| ZAP70       | 7535       | 2.078  | 1.346        |

**Cell adhesion**

| hgnc_symbol | entrezgene | LogFC  | -Log10(pVal) |
|-------------|------------|--------|--------------|
| CD24        | 100133941  | -4.784 | 5.267        |
| EPHA7       | 2045       | -4.118 | 3.827        |
| LEF1        | 51176      | -3.176 | 4.031        |
| JAG2        | 3714       | -3.000 | 2.552        |
| TGFBI       | 7045       | -2.431 | 7.127        |
| THBS1       | 7057       | -2.361 | 4.219        |
| FZD7        | 8324       | -2.118 | 3.574        |
| NRG1        | 3084       | 6.365  | 8.561        |
| SFRP1       | 6422       | 5.989  | 7.465        |
| EPHA3       | 2042       | 5.101  | 8.700        |
| CD209       | 30835      | 4.691  | 5.125        |
| LAMA2       | 3908       | 4.421  | 9.904        |
| CD28        | 940        | 4.036  | 3.062        |
| PIK3R6      | 146850     | 3.763  | 2.983        |
| TNFRSF21    | 27242      | 3.690  | 3.960        |
| PDE3B       | 5140       | 3.614  | 5.697        |

|          |        |       |       |
|----------|--------|-------|-------|
| TNFSF4   | 7292   | 3.430 | 3.555 |
| RASAL3   | 64926  | 3.193 | 3.569 |
| VAV3     | 10451  | 2.875 | 2.867 |
| PTPRZ1   | 5803   | 2.875 | 1.865 |
| KIF26B   | 55083  | 2.760 | 3.502 |
| IL7R     | 3575   | 2.693 | 3.431 |
| ITGA4    | 3676   | 2.634 | 2.023 |
| FMN1     | 342184 | 2.614 | 3.703 |
| PLET1    | 349633 | 2.597 | 2.185 |
| HAS2     | 3037   | 2.542 | 1.905 |
| CD80     | 941    | 2.506 | 1.404 |
| LILRB2   | 10288  | 2.463 | 1.755 |
| FERMT3   | 83706  | 2.443 | 1.675 |
| SYK      | 6850   | 2.359 | 1.905 |
| CD247    | 919    | 2.312 | 1.762 |
| CD3E     | 916    | 2.284 | 1.876 |
| HLA-DMB  | 3109   | 2.262 | 1.700 |
| PRKCQ    | 5588   | 2.233 | 1.729 |
| HLA-DQA1 | 3117   | 2.131 | 1.890 |
| BMP2     | 650    | 2.124 | 2.524 |
| DPP4     | 1803   | 2.117 | 1.357 |
| PTPRC    | 5788   | 2.097 | 3.130 |
| ZAP70    | 7535   | 2.078 | 1.346 |
| HLA-DQB1 | 3119   | 2.076 | 2.158 |
| RAC2     | 5880   | 2.061 | 1.324 |
| CDH13    | 1012   | 2.037 | 6.421 |

#### EC differentiation

| hgnc_symbol | entrezgene | LogFC  | -Log10(pVal) |
|-------------|------------|--------|--------------|
| HEY1        | 23462      | -4.932 | 5.868        |
| PDE4D       | 5144       | -2.943 | 9.053        |
| NRG1        | 3084       | 6.365  | 8.561        |
| BMPER       | 168667     | 2.318  | 1.381        |

#### Vascular permeability

| hgnc_symbol | entrezgene | LogFC  | -Log10(pVal) |
|-------------|------------|--------|--------------|
| PTP4A3      | 11156      | -2.843 | 4.916        |
| NPR1        | 4881       | 2.510  | 4.823        |
| SLIT2       | 9353       | 2.299  | 5.967        |

### Table S3C

#### Perfusion and cognition related genes

| hgnc_symbol | entrezgene | LogFC  | -Log10(pVal) |
|-------------|------------|--------|--------------|
| CACNA1S     | 779        | -7.512 | 10.333       |
| STRA6       | 64220      | -4.616 | 3.695        |
| NOS1        | 4842       | -4.312 | 4.619        |
| DSP         | 1832       | -4.049 | 3.613        |



|        |       |        |       |
|--------|-------|--------|-------|
| HRH2   | 3274  | -4.035 | 1.895 |
| HOPX   | 84525 | -3.787 | 3.343 |
| PDE4D  | 5144  | -2.943 | 9.053 |
| GABRB3 | 2562  | -2.275 | 2.004 |
| NRG1   | 3084  | 6.365  | 8.561 |
| NRXN2  | 9379  | 4.006  | 3.994 |
| MYL4   | 4635  | 3.778  | 5.711 |
| CNR1   | 1268  | 2.890  | 3.065 |
| RYR3   | 6263  | 2.818  | 9.264 |
| SCN3B  | 55800 | 2.402  | 1.305 |
| MUSK   | 4593  | 2.201  | 1.946 |

**Figure S1**

**Average expression stability of remaining reference targets**

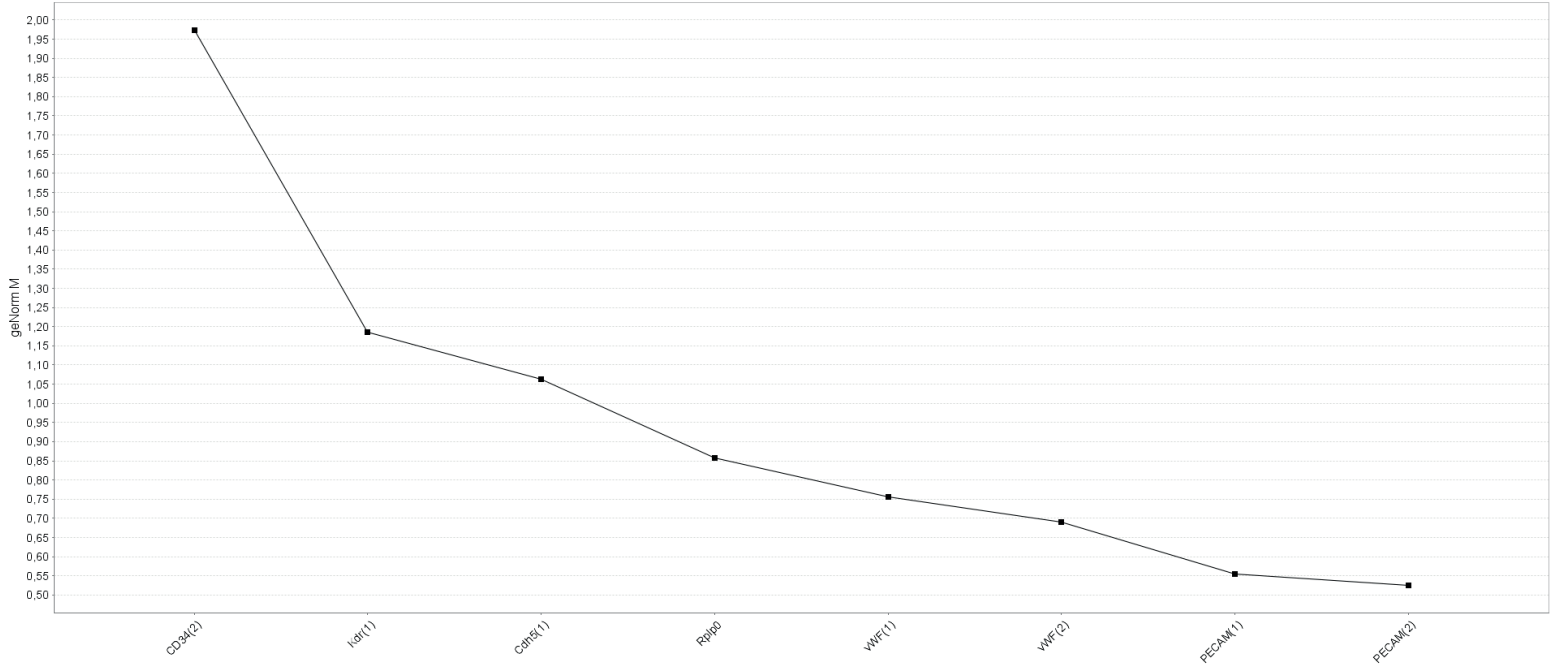

Figure S2

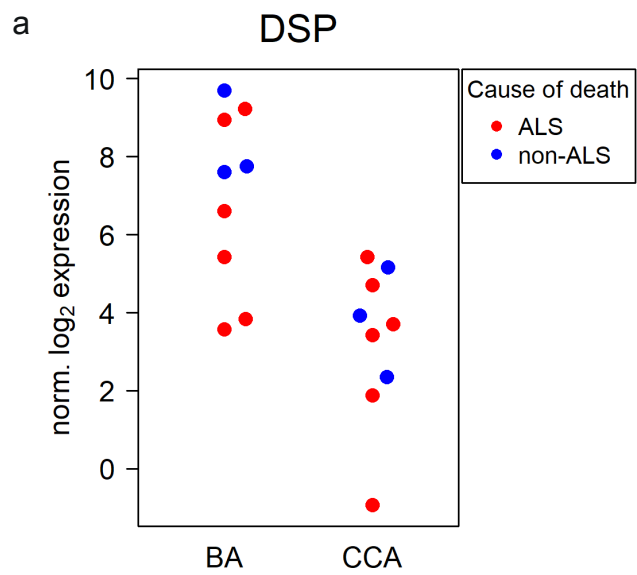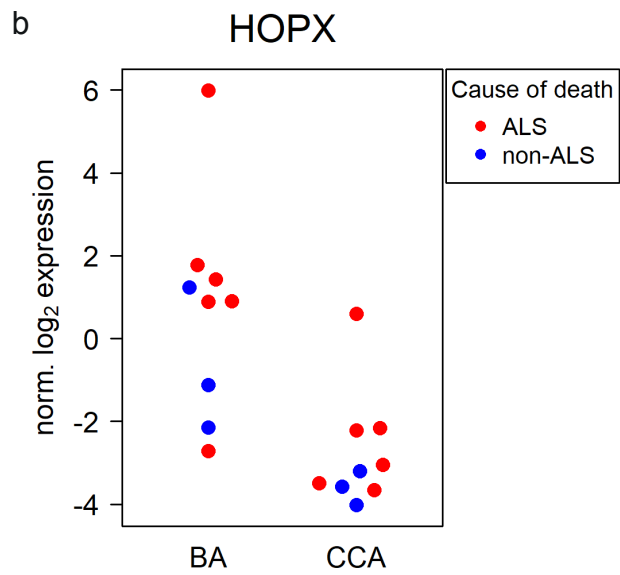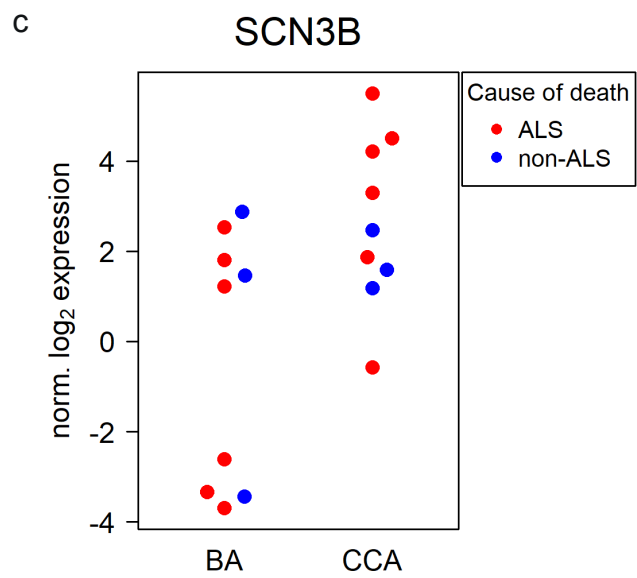

Figure S3

a

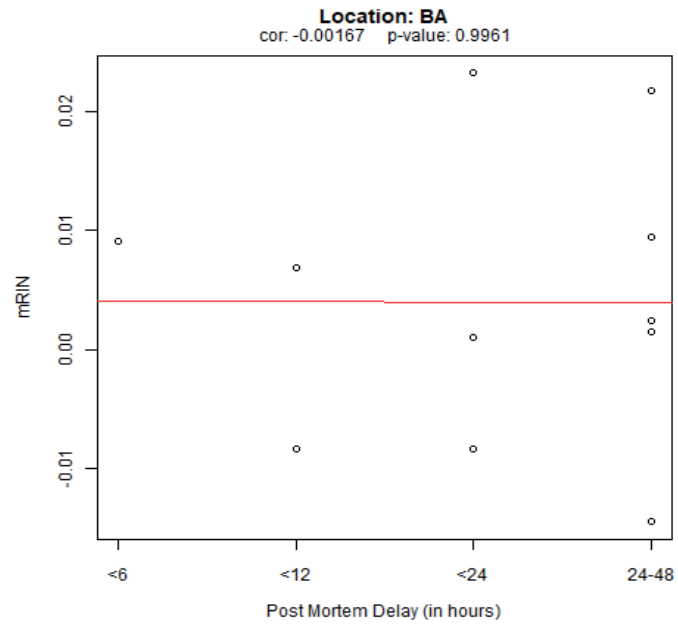

b

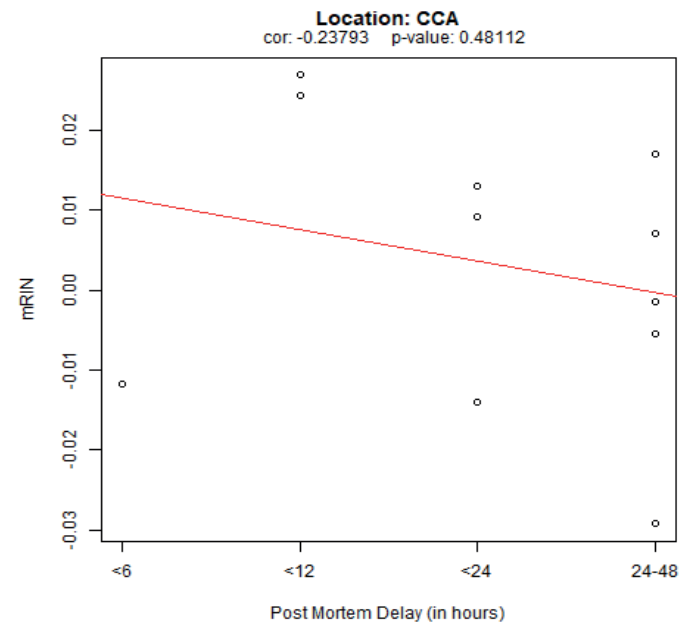

Supplement: 40478_2019_805_MOESM1_ESM.pdf [file 40478_2019_805_MOESM1_ESM.pdf]
